# Supplementary material for: Evaluating seasonal hydrological extremes in mesoscale (pre-)Alpine basins at coarse 0.5° and fine hyperresolution
Source: Copernicus journal article supplement (doi:10.5194/hess-23-1593-2019), 2019-03-19
Supplement: Supplementary file 1 [file hess-23-1593-2019-supplement.pdf]

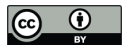

*Supplement of*

## **Evaluating seasonal hydrological extremes in mesoscale (pre-)Alpine basins at coarse 0.5° and fine hyperresolution**

**Joost Buitink et al.**

*Correspondence to:* Joost Buitink ([joost.buitink@wur.nl](mailto:joost.buitink@wur.nl))

The copyright of individual parts of the supplement might differ from the CC BY 4.0 License.

# Monthly anomaly maps

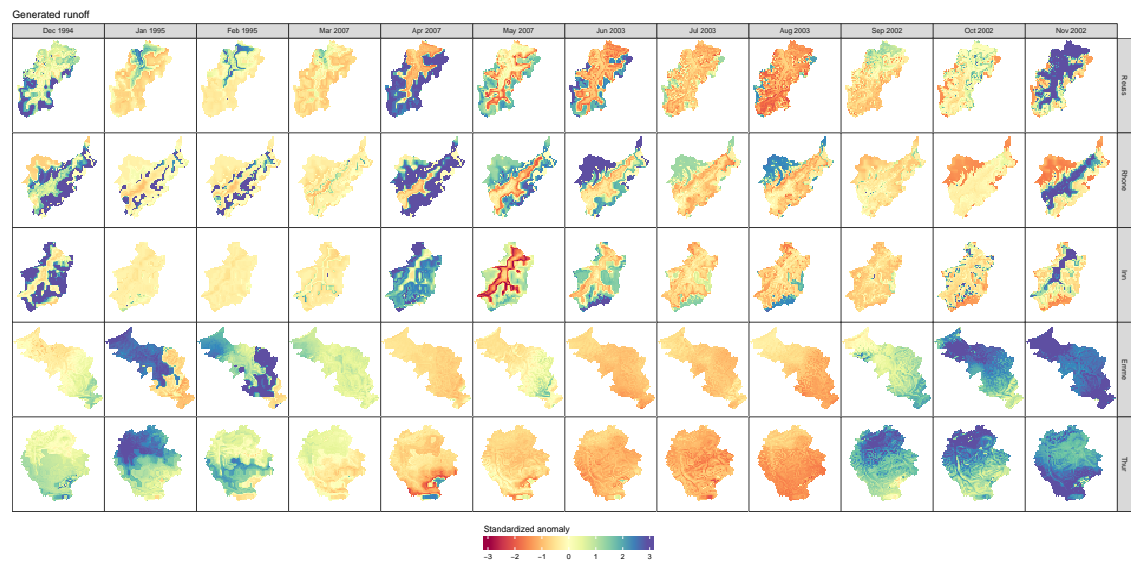

Figure S1: Spatial distribution of monthly anomalies of generated runoff, during the months of the selected season. Each box represents an area of  $\sim 40 \times 40$  km.

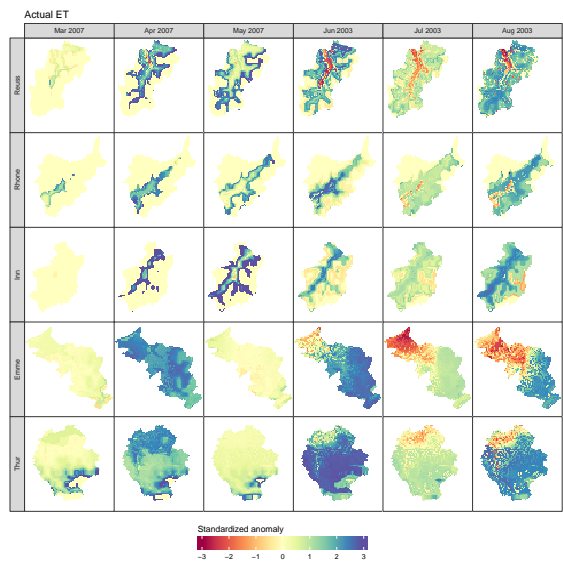

Figure S2: Spatial distribution of monthly anomalies of actual evapotranspiration, during the months of the selected season. Each box represents an area of  $\sim 40 \times 40$  km.
